# Supplementary material for: Hydrothermal syntheses, structural characterizations, and magnetic properties of five MOFs assembled from C2-symmetric ligand of 1,3-di(2′,4′-dicarboxylphenyl)benzene with various coordination modes
Source: Royal Society of Chemistry journal article supplement (doi:10.1039/c5ra04559b), 2015-01-01
Supplement: c5ra04559b1.pdf [file c5ra04559b1.pdf]

*Electronic Supplementary Information (ESI) for*

## **Hydrothermal Syntheses, Structural Characterizations, and Magnetic Properties of Five MOFs Assembled From C<sub>2</sub>-Symmetric Ligand of 1,3-Di((2',4'- dicarboxylphenyl)benzene with Various Coordination Modes**

Liming Fan,<sup>a,b</sup> Weiliu Fan,<sup>b</sup> Bin Li<sup>a</sup> Xian Zhao<sup>\*b</sup> and Xiutang Zhang,<sup>\*a,b</sup>

<sup>a</sup>State Key Laboratory of Crystal Materials, Shandong University, Jinan 250100, China.

<sup>b</sup>Advanced Material Institute of Research, College of Chemistry and Chemical Engineering, Qilu Normal University, Jinan, 250013, China.

E-mail: zhaoxian@sdu.edu.cn; xiutangzhang@163.com.

ESI

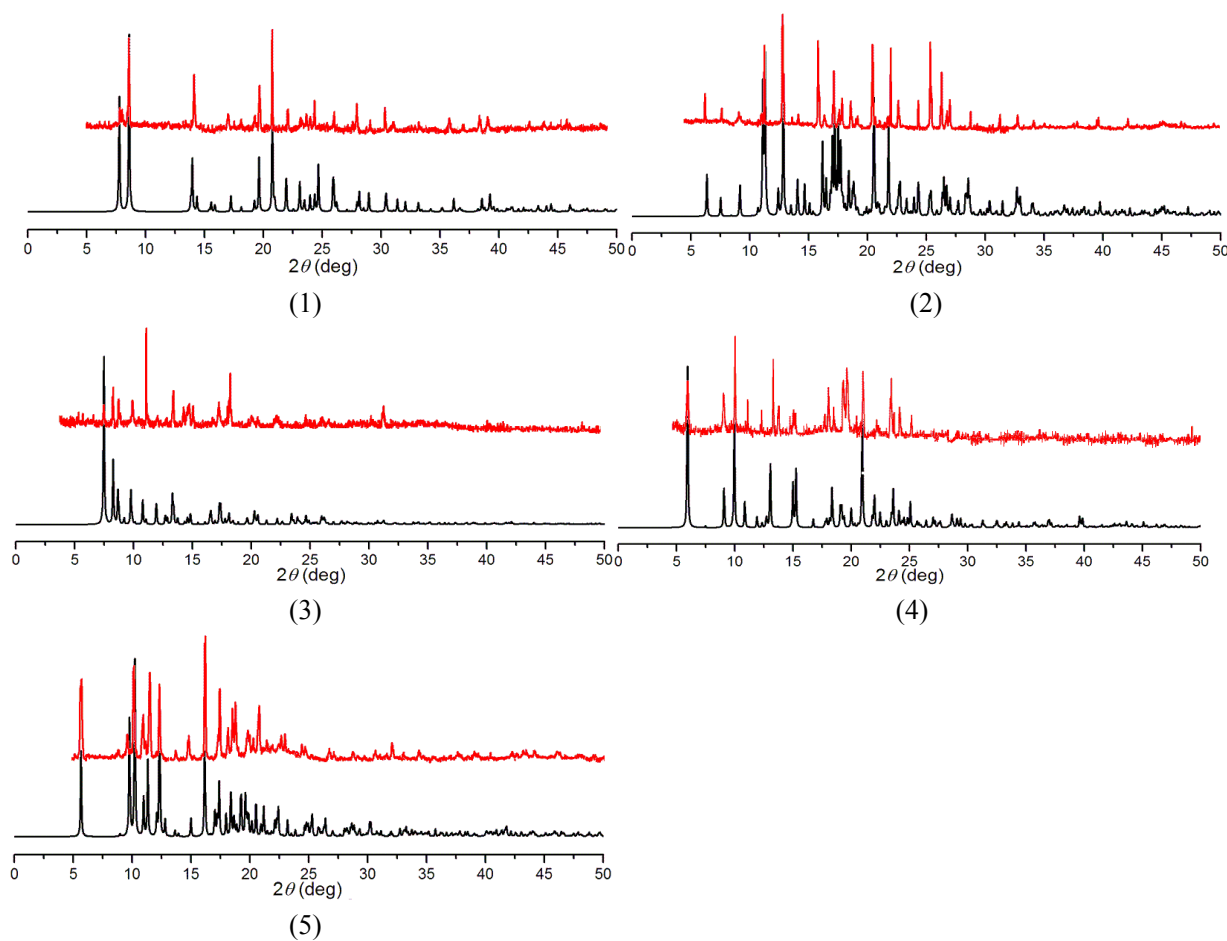

**Figure S1.** PXRD patterns of 1-5. Dark: calculated from the X-ray single-crystal data; Red: observed for the as-synthesized solids.

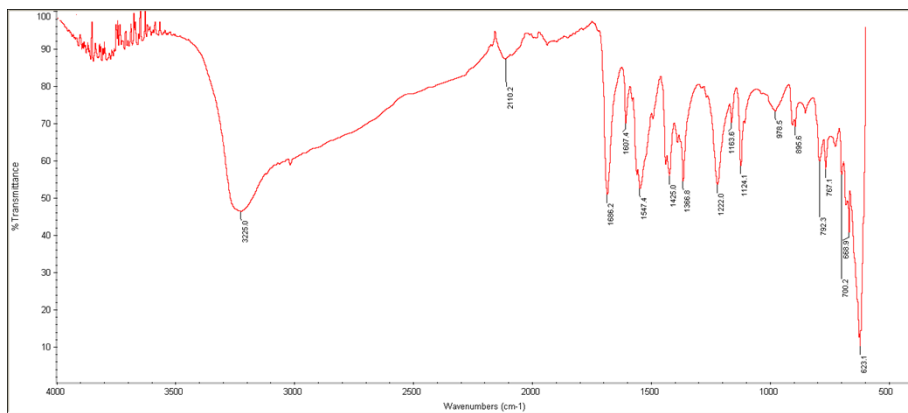

(1)

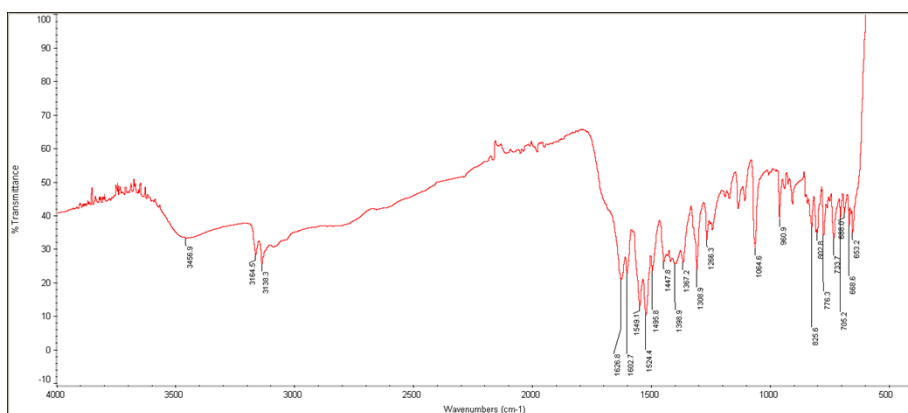

(2)

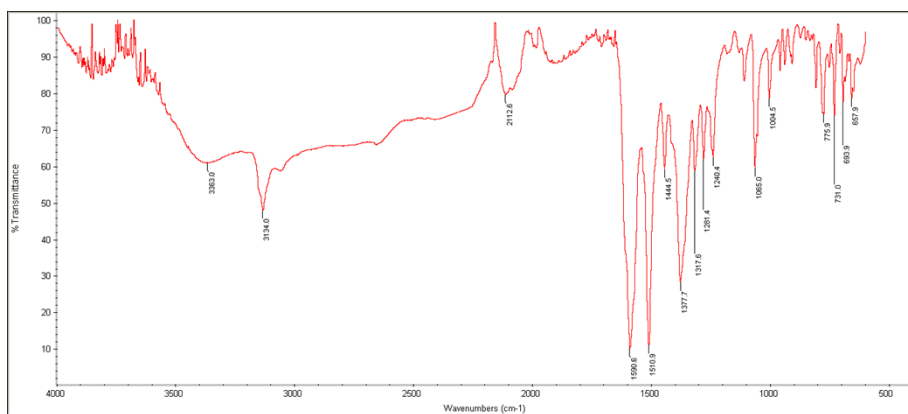

(3)

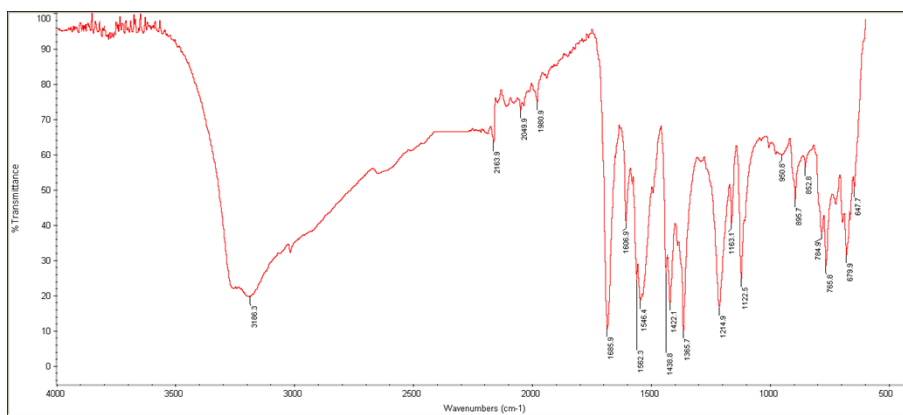

(4)

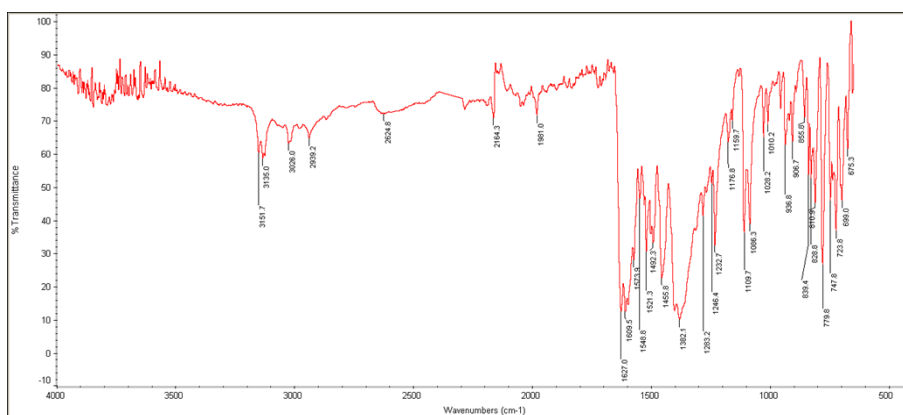

(5)

Figure S2. The IR spectra of complexes 1-5.

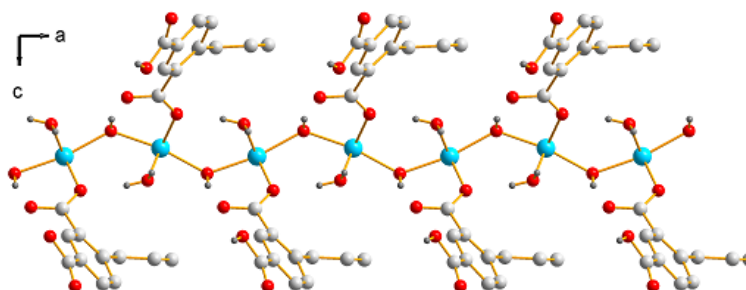

Figure S3. The 1D infinite  $[\text{Ni}(\text{H}_2\text{DDB})(\text{H}_2\text{O})_2(\mu_2\text{-H}_2\text{O})]_n$  chain in 1 view along  $b$  axis.

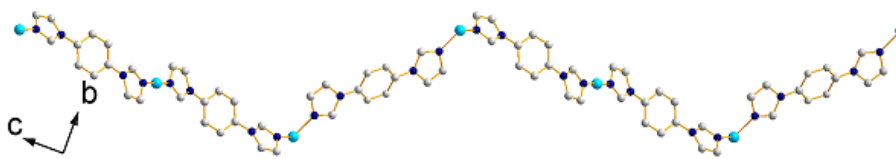

Figure S4. The 1D  $[\text{Ni}(1,4\text{-bib})]_n$  zigzag chain in 2 view along  $a$  axis.

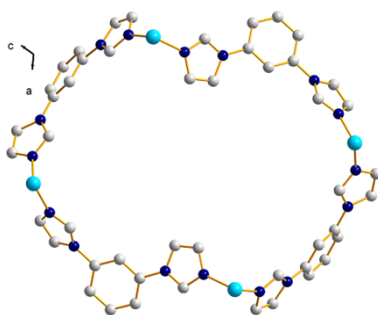

**Figure S5.** The interestingly  $[\text{Ni}_4(1,3\text{-bib})_4]$  loop in **3**.

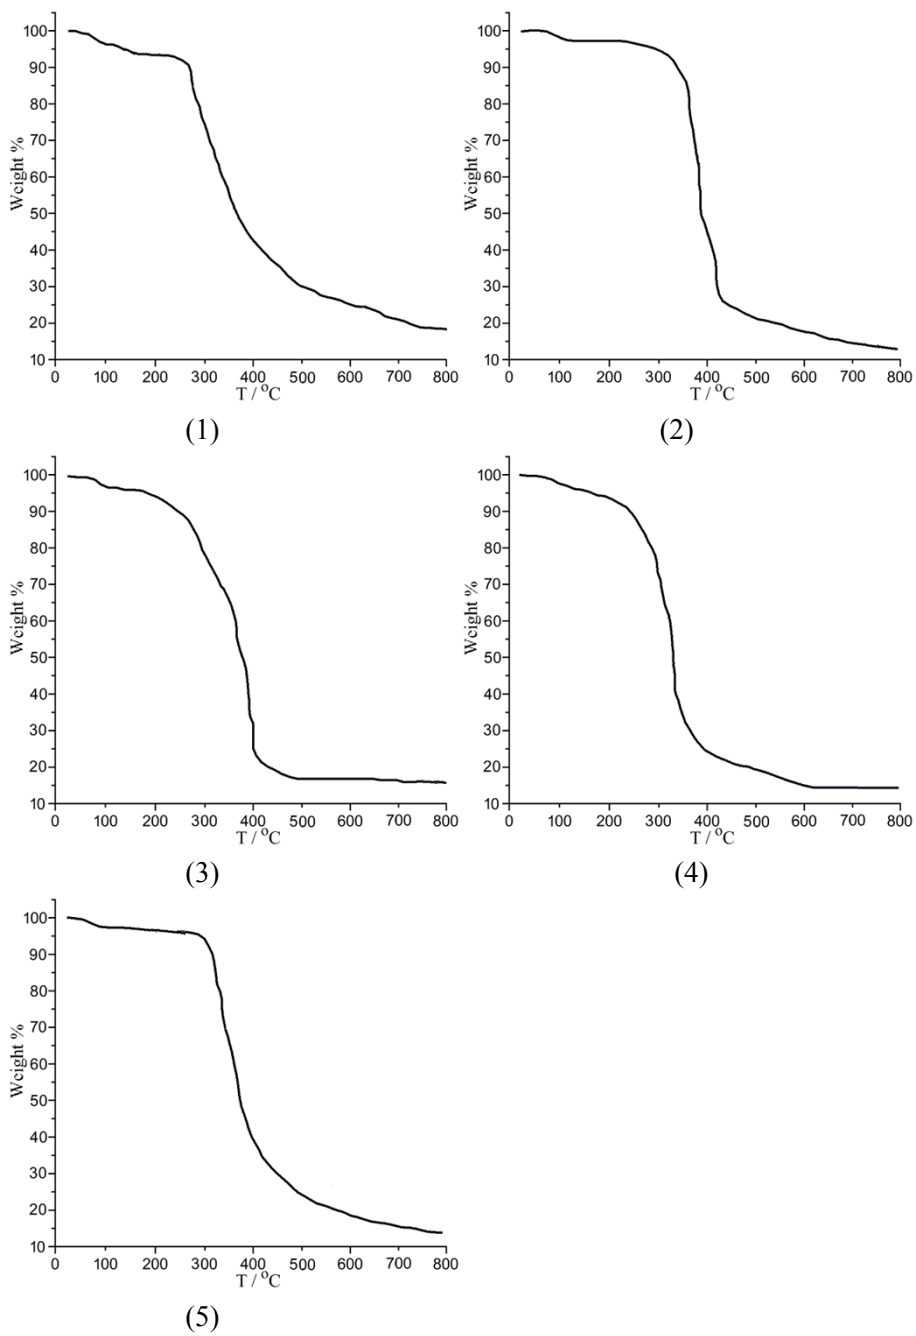

**Figure S6.** TG curves of 1-5.

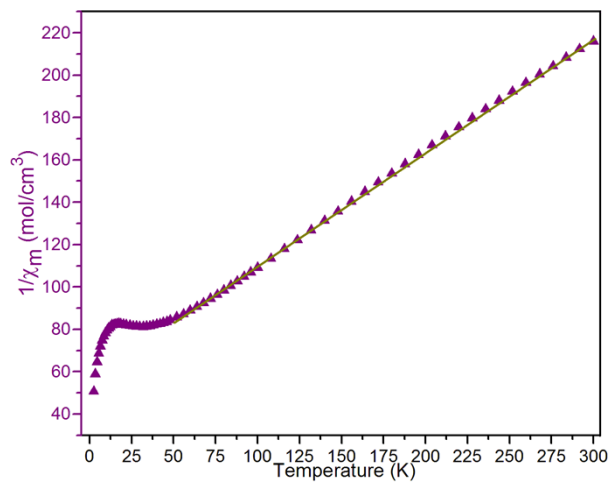

**Figure S7.** The  $\chi_M^{-1}$ -T of **1** under a static field of 1000 Oe.

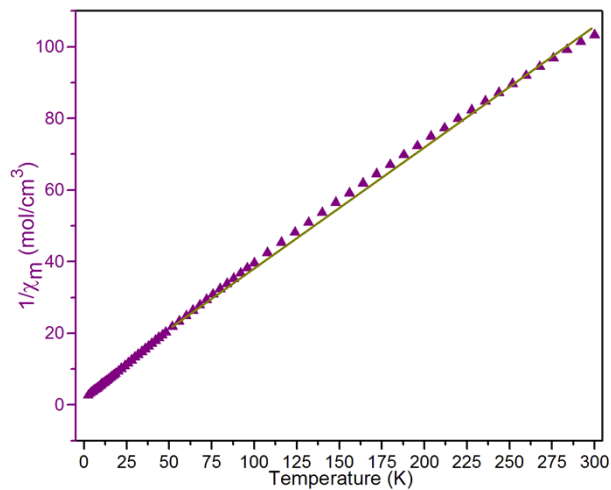

**Figure S8.** The  $\chi_M^{-1}$ -T of **3** under a static field of 1000 Oe.

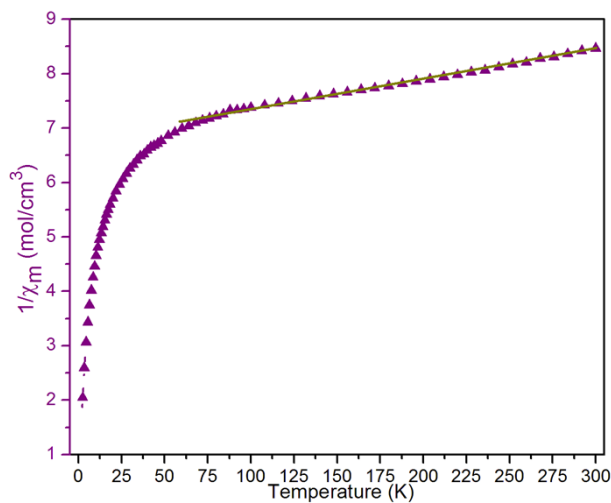

**Figure S9.** The  $\chi_M^{-1}$ -T of **5** under a static field of 1000 Oe.

**Table S1** Selected bond lengths (Å) and angles (°) for **1 – 5**.

|                                                                                                                                                                                                             |            |                                              |            |                                              |            |                                              |            |
|-------------------------------------------------------------------------------------------------------------------------------------------------------------------------------------------------------------|------------|----------------------------------------------|------------|----------------------------------------------|------------|----------------------------------------------|------------|
| <b>Complex 1</b>                                                                                                                                                                                            |            |                                              |            |                                              |            |                                              |            |
| Ni(1)-O(6)                                                                                                                                                                                                  | 2.0208(13) | Ni(1)-O(1)                                   | 2.0483(12) | Ni(1)-O(5)                                   | 2.1032(18) | O(6) <sup>#1</sup> -Ni(1)-O(6)               | 93.93(8)   |
| O(6)-Ni(1)-O(1) <sup>#1</sup>                                                                                                                                                                               | 175.21(6)  | O(1) <sup>#1</sup> -Ni(1)-O(1)               | 85.71(7)   | O(1)-Ni(1)-O(5)                              | 94.82(5)   | O(1) <sup>#1</sup> -Ni(1)-O(5) <sup>#2</sup> | 92.14(5)   |
| O(6)-Ni(1)-O(1) <sup>#1</sup>                                                                                                                                                                               | 90.13(5)   | O(6)-Ni(1)-O(5)                              | 87.87(5)   | O(6)-Ni(1)-O(5) <sup>#2</sup>                | 85.64(5)   | O(1)-Ni(1)-O(5) <sup>#2</sup>                | 92.14(5)   |
| O(6) <sup>#1</sup> -Ni(1)-O(1)                                                                                                                                                                              | 90.13(5)   | O(6) <sup>#1</sup> -Ni(1)-O(5)               | 87.87(5)   | O(6) <sup>#1</sup> -Ni(1)-O(5) <sup>#2</sup> | 85.64(5)   | O(5)-Ni(1)-O(5) <sup>#2</sup>                | 170.49(4)  |
| O(6)-Ni(1)-O(1)                                                                                                                                                                                             | 175.21(6)  | O(1) <sup>#1</sup> -Ni(1)-O(5)               | 94.82(5)   |                                              |            |                                              |            |
| Symmetry codes: #1 <i>x</i> , - <i>y</i> +3/2, <i>z</i> ; #2 <i>x</i> +1/2, <i>y</i> , - <i>z</i> +1/2.                                                                                                     |            |                                              |            |                                              |            |                                              |            |
| <b>Complex 2</b>                                                                                                                                                                                            |            |                                              |            |                                              |            |                                              |            |
| N(1)-Ni(1)                                                                                                                                                                                                  | 2.0398(16) | Ni(1)-O(8) <sup>#2</sup>                     | 2.1059(14) | Ni(2)-O(9)                                   | 2.0693(15) | Ni(2)-O(4)                                   | 2.1028(13) |
| N(6)-Ni(2)                                                                                                                                                                                                  | 2.0787(13) | Ni(1)-O(8) <sup>#3</sup>                     | 2.1059(14) | Ni(2)-N(4) <sup>#4</sup>                     | 2.0717(15) | Ni(2)-O(3)                                   | 2.1671(13) |
| Ni(1)-O(2)                                                                                                                                                                                                  | 2.0787(13) | Ni(2)-N(6)                                   | 2.0536(17) | Ni(2)-O(5)                                   | 2.0745(14) | N(1) <sup>#1</sup> -Ni(1)-N(1)               | 180.0      |
| N(1) <sup>#1</sup> -Ni(1)-O(2) <sup>#1</sup>                                                                                                                                                                | 89.33(6)   | O(2) <sup>#1</sup> -Ni(1)-O(8) <sup>#2</sup> | 94.85(6)   | N(6)-Ni(2)-O(9)                              | 98.83(7)   | O(9)-Ni(2)-O(4)                              | 99.51(6)   |
| N(1)-Ni(1)-O(2) <sup>#1</sup>                                                                                                                                                                               | 90.67(6)   | O(2)-Ni(1)-O(8) <sup>#2</sup>                | 85.15(6)   | N(6)-Ni(2)-N(4) <sup>#4</sup>                | 99.39(7)   | N(4) <sup>#4</sup> -Ni(2)-O(4)               | 88.24(6)   |
| N(1) <sup>#1</sup> -Ni(1)-O(2)                                                                                                                                                                              | 90.67(6)   | N(1) <sup>#1</sup> -Ni(1)-O(8) <sup>#3</sup> | 93.28(6)   | O(9)-Ni(2)-N(4) <sup>#4</sup>                | 93.00(6)   | O(5)-Ni(2)-O(4)                              | 83.51(6)   |
| N(1)-Ni(1)-O(2)                                                                                                                                                                                             | 89.33(6)   | N(1)-Ni(1)-O(8) <sup>#3</sup>                | 86.72(6)   | N(6)-Ni(2)-O(5)                              | 88.03(6)   | N(6)-Ni(2)-O(3)                              | 99.31(6)   |
| O(2) <sup>#1</sup> -Ni(1)-O(2)                                                                                                                                                                              | 180.0      | O(2) <sup>#1</sup> -Ni(1)-O(8) <sup>#3</sup> | 85.15(6)   | O(9)-Ni(2)-O(5)                              | 89.61(6)   | O(9)-Ni(2)-O(3)                              | 160.89(6)  |
| N(1) <sup>#1</sup> -Ni(1)-O(8) <sup>#2</sup>                                                                                                                                                                | 86.72(6)   | O(2)-Ni(1)-O(8) <sup>#3</sup>                | 94.85(6)   | N(4) <sup>#4</sup> -Ni(2)-O(5)               | 171.66(6)  | N(4) <sup>#4</sup> -Ni(2)-O(3)               | 89.97(6)   |
| N(1)-Ni(1)-O(8) <sup>#2</sup>                                                                                                                                                                               | 93.28(6)   | O(8) <sup>#2</sup> -Ni(1)-O(8) <sup>#3</sup> | 180.000(1) | N(6)-Ni(2)-O(4)                              | 159.71(6)  | O(5)-Ni(2)-O(3)                              | 85.03(5)   |
| O(4)-Ni(2)-O(3)                                                                                                                                                                                             | 61.68(5)   |                                              |            |                                              |            |                                              |            |
| Symmetry codes: #1 - <i>x</i> +2, - <i>y</i> +1, - <i>z</i> +1; #2 - <i>x</i> +3/2, <i>y</i> +1/2, - <i>z</i> +1/2; #3 <i>x</i> +1/2, - <i>y</i> +1/2, <i>z</i> +1/2; #4 <i>x</i> +1, <i>y</i> , <i>z</i> . |            |                                              |            |                                              |            |                                              |            |
| <b>Complex 3</b>                                                                                                                                                                                            |            |                                              |            |                                              |            |                                              |            |
| N(1)-Ni(2)                                                                                                                                                                                                  | 2.069(3)   | O(9)-Ni(1)                                   | 2.063(2)   | Ni(1)-N(4) <sup>#1</sup>                     | 2.070(3)   | Ni(2)-O(5) <sup>#1</sup>                     | 2.059(2)   |
| N(7)-Ni(1)                                                                                                                                                                                                  | 2.072(3)   | O(9)-Ni(2)                                   | 2.098(2)   | Ni(1)-O(4) <sup>#1</sup>                     | 2.188(2)   | Ni(2)-O(7) <sup>#6</sup>                     | 2.068(2)   |
| O(1)-Ni(1)                                                                                                                                                                                                  | 2.056(2)   | Ni(1)-O(6) <sup>#1</sup>                     | 2.050(2)   | Ni(2)-N(5) <sup>#5</sup>                     | 2.057(3)   | Ni(2)-O(4) <sup>#1</sup>                     | 2.179(2)   |
| O(6) <sup>#1</sup> -Ni(1)-O(1)                                                                                                                                                                              | 176.48(9)  | O(9)-Ni(1)-N(7)                              | 88.87(10)  | N(5) <sup>#5</sup> -Ni(2)-O(7) <sup>#6</sup> | 89.41(10)  | O(7) <sup>#6</sup> -Ni(2)-O(9)               | 89.84(8)   |
| O(6) <sup>#1</sup> -Ni(1)-O(9)                                                                                                                                                                              | 88.41(9)   | N(4) <sup>#1</sup> -Ni(1)-N(7)               | 91.40(11)  | O(5) <sup>#1</sup> -Ni(2)-O(7) <sup>#6</sup> | 89.13(9)   | N(1)-Ni(2)-O(9)                              | 86.32(10)  |
| O(1)-Ni(1)-O(9)                                                                                                                                                                                             | 95.11(9)   | O(6) <sup>#1</sup> -Ni(1)-O(4) <sup>#1</sup> | 91.18(8)   | N(5) <sup>#5</sup> -Ni(2)-N(1)               | 91.23(12)  | N(5) <sup>#5</sup> -Ni(2)-O(4) <sup>#1</sup> | 106.88(9)  |
| O(6) <sup>#1</sup> -Ni(1)-N(4) <sup>#1</sup>                                                                                                                                                                | 85.97(10)  | O(1)-Ni(1)-O(4) <sup>#1</sup>                | 89.71(9)   | O(5) <sup>#1</sup> -Ni(2)-N(1)               | 174.84(10) | O(5) <sup>#1</sup> -Ni(2)-O(4) <sup>#1</sup> | 83.34(9)   |
| O(1)-Ni(1)-N(4) <sup>#1</sup>                                                                                                                                                                               | 90.51(9)   | O(9)-Ni(1)-O(4) <sup>#1</sup>                | 74.78(8)   | O(7) <sup>#6</sup> -Ni(2)-N(1)               | 89.76(10)  | O(7) <sup>#6</sup> -Ni(2)-O(4) <sup>#1</sup> | 161.09(9)  |
| O(9)-Ni(1)-N(4) <sup>#1</sup>                                                                                                                                                                               | 174.37(9)  | N(4) <sup>#1</sup> -Ni(1)-O(4) <sup>#1</sup> | 104.98(9)  | N(5) <sup>#5</sup> -Ni(2)-O(9)               | 177.45(10) | N(1)-Ni(2)-O(4) <sup>#1</sup>                | 99.20(9)   |
| O(6) <sup>#1</sup> -Ni(1)-N(7)                                                                                                                                                                              | 89.30(10)  | N(7)-Ni(1)-O(4) <sup>#1</sup>                | 163.62(10) | O(5) <sup>#1</sup> -Ni(2)-O(9)               | 98.72(9)   | O(9)-Ni(2)-O(4) <sup>#1</sup>                | 74.28(8)   |
| O(1)-Ni(1)-N(7)                                                                                                                                                                                             | 90.81(10)  | N(5) <sup>#5</sup> -Ni(2)-O(5) <sup>#1</sup> | 83.71(10)  |                                              |            |                                              |            |
| Symmetry codes: #1 - <i>x</i> +2, - <i>y</i> +1, - <i>z</i> -1; #5 <i>x</i> , - <i>y</i> +1, <i>z</i> -1/2; #6 <i>x</i> +1/2, - <i>y</i> +1/2, <i>z</i> +1/2.                                               |            |                                              |            |                                              |            |                                              |            |
| <b>Complex 4</b>                                                                                                                                                                                            |            |                                              |            |                                              |            |                                              |            |
| Cu(1)-O(4) <sup>#1</sup>                                                                                                                                                                                    | 2.030(3)   | Cu(1)-O(3)                                   | 2.032(3)   | Cu(1)-O(6) <sup>#1</sup>                     | 2.046(3)   | Cu(1)-O(5)                                   | 2.051(3)   |
| Cu(1)-N(1)                                                                                                                                                                                                  | 2.029(3)   | O(4) <sup>#1</sup> -Cu(1)-N(1)               | 94.65(12)  | O(4) <sup>#1</sup> -Cu(1)-O(3)               | 164.10(11) | N(1)-Cu(1)-O(3)                              | 101.24(12) |
| O(4) <sup>#1</sup> -Cu(1)-O(6) <sup>#1</sup>                                                                                                                                                                | 87.54(11)  | O(3)-Cu(1)-O(6) <sup>#1</sup>                | 89.18(11)  | N(1)-Cu(1)-O(5)                              | 95.64(13)  | O(6) <sup>#1</sup> -Cu(1)-O(5)               | 164.67(12) |
| N(1)-Cu(1)-O(6) <sup>#1</sup>                                                                                                                                                                               | 99.68(13)  | O(4) <sup>#1</sup> -Cu(1)-O(5)               | 90.73(12)  | O(3)-Cu(1)-O(5)                              | 88.33(12)  |                                              |            |
| Symmetry code: #1 - <i>x</i> +1, - <i>y</i> +2, - <i>z</i> +1.                                                                                                                                              |            |                                              |            |                                              |            |                                              |            |
| <b>Complex 5</b>                                                                                                                                                                                            |            |                                              |            |                                              |            |                                              |            |
| O(2)-Cu(1)                                                                                                                                                                                                  | 1.995(2)   | Cu(1)-O(5) <sup>#1</sup>                     | 1.957(3)   | Cu(1)-N(1) <sup>#2</sup>                     | 2.123(3)   | Cu(2)-N(3) <sup>#3</sup>                     | 1.963(3)   |
| O(6)-Cu(1)                                                                                                                                                                                                  | 1.953(2)   | Cu(1)-O(1) <sup>#1</sup>                     | 1.978(3)   | Cu(2)-N(3)                                   | 1.963(3)   | Cu(2)-O(8) <sup>#3</sup>                     | 1.997(3)   |
| O(8)-Cu(2)                                                                                                                                                                                                  | 1.997(3)   | O(5) <sup>#1</sup> -Cu(1)-O(2)               | 90.05(11)  | O(1) <sup>#1</sup> -Cu(1)-N(1) <sup>#2</sup> | 98.67(12)  | N(3) <sup>#3</sup> -Cu(2)-O(8)               | 92.29(13)  |
| O(6)-Cu(1)-O(5) <sup>#1</sup>                                                                                                                                                                               | 166.73(11) | O(1) <sup>#1</sup> -Cu(1)-O(2)               | 167.00(11) | O(2)-Cu(1)-N(1) <sup>#2</sup>                | 94.33(12)  | N(3)-Cu(2)-O(8) <sup>#3</sup>                | 92.29(13)  |
| O(6)-Cu(1)-O(1) <sup>#1</sup>                                                                                                                                                                               | 89.73(10)  | O(6)-Cu(1)-N(1) <sup>#2</sup>                | 96.27(12)  | N(3)-Cu(2)-N(3) <sup>#3</sup>                | 180.00(15) | N(3) <sup>#3</sup> -Cu(2)-O(8) <sup>#3</sup> | 87.71(13)  |
| O(5) <sup>#1</sup> -Cu(1)-O(1) <sup>#1</sup>                                                                                                                                                                | 88.55(11)  | O(5) <sup>#1</sup> -Cu(1)-N(1) <sup>#2</sup> | 97.00(13)  | N(3)-Cu(2)-O(8)                              | 87.71(13)  | O(8)-Cu(2)-O(8) <sup>#3</sup>                | 180.00(12) |
| O(6)-Cu(1)-O(2)                                                                                                                                                                                             | 88.67(10)  |                                              |            |                                              |            |                                              |            |
| Symmetry codes: #1 - <i>x</i> +1, - <i>y</i> +1, - <i>z</i> +2; #2 - <i>x</i> +1/2, <i>y</i> +1/2, - <i>z</i> +3/2; #3 - <i>x</i> +1, - <i>y</i> +1, - <i>z</i> +1.                                         |            |                                              |            |                                              |            |                                              |            |

**Table S2** The hydrogen bonds in complex **1**.

| Donor--H...Acceptor                                                                                                                                                                                     | d(D---A) (Å) | d(D---H) (Å) | d(H...A) (Å) | ∠DHA (°) |
|---------------------------------------------------------------------------------------------------------------------------------------------------------------------------------------------------------|--------------|--------------|--------------|----------|
| O(5)--H(1w)...O(2) <sup>#1</sup>                                                                                                                                                                        | 2.623        | 0.820        | 1.832        | 161.61   |
| O(3)--H(3)...O(2) <sup>#2</sup>                                                                                                                                                                         | 2.751        | 0.820        | 1.960        | 161.74   |
| O(6)--H(3w)...O(1) <sup>#3</sup>                                                                                                                                                                        | 2.716        | 0.858        | 1.862        | 172.67   |
| O(3)--H(4w)...O(4) <sup>#4</sup>                                                                                                                                                                        | 2.699        | 0.840        | 1.868        | 161.81   |
| C(8)--H(8)...O(3) <sup>#2</sup>                                                                                                                                                                         | 3.223        | 0.930        | 2.504        | 134.36   |
| Symmetry codes: #1 <i>x</i> , - <i>y</i> +3/2, <i>z</i> ; #2 - <i>x</i> , - <i>y</i> +1, - <i>z</i> +1; #3 <i>x</i> -1/2, <i>y</i> , - <i>z</i> +1/2; #4 - <i>x</i> +1/2, - <i>y</i> +1, <i>z</i> -1/2. |              |              |              |          |

**Table S3** The hydrogen bonds in complex **4**.

| Donor--H...Acceptor                                                                                                                                                                                 | d(D---A) (Å) | d(D---H) (Å) | d(H...A) (Å) | ∠DHA (°) |
|-----------------------------------------------------------------------------------------------------------------------------------------------------------------------------------------------------|--------------|--------------|--------------|----------|
| O(2)--H(2)...O(8) <sup>#1</sup>                                                                                                                                                                     | 2.636        | 0.820        | 1.834        | 165.54   |
| O(7)--H(7A)...N(4) <sup>#2</sup>                                                                                                                                                                    | 2.558        | 0.820        | 1.758        | 165.54   |
| C(27)--H(27)...O(4) <sup>#3</sup>                                                                                                                                                                   | 3.433        | 0.930        | 2.602        | 149.24   |
| C(32)--H(32)...O(1) <sup>#3</sup>                                                                                                                                                                   | 3.074        | 0.930        | 2.472        | 122.55   |
| C(4) <sup>#4</sup> --H(4) <sup>#4</sup> ...O(3)                                                                                                                                                     | 3.172        | 0.930        | 2.524        | 127.06   |
| Symmetry codes: #1 - <i>x</i> +3/2, - <i>y</i> +2, <i>z</i> +1/2; #2 <i>x</i> , - <i>y</i> +1/2, <i>z</i> -1/2; #3 <i>x</i> , <i>y</i> -1, <i>z</i> ; #4 - <i>x</i> +3/2, <i>y</i> -1/2, <i>z</i> . |              |              |              |          |
